# Supplementary material
Source: Springer Nature journal article supplement (https://www.springermedizin.de/resource/supplementary/12958_2010_839_MOESM12_ESM.pdf/9568978)
Supplement: MOESM12 [file 9568978]

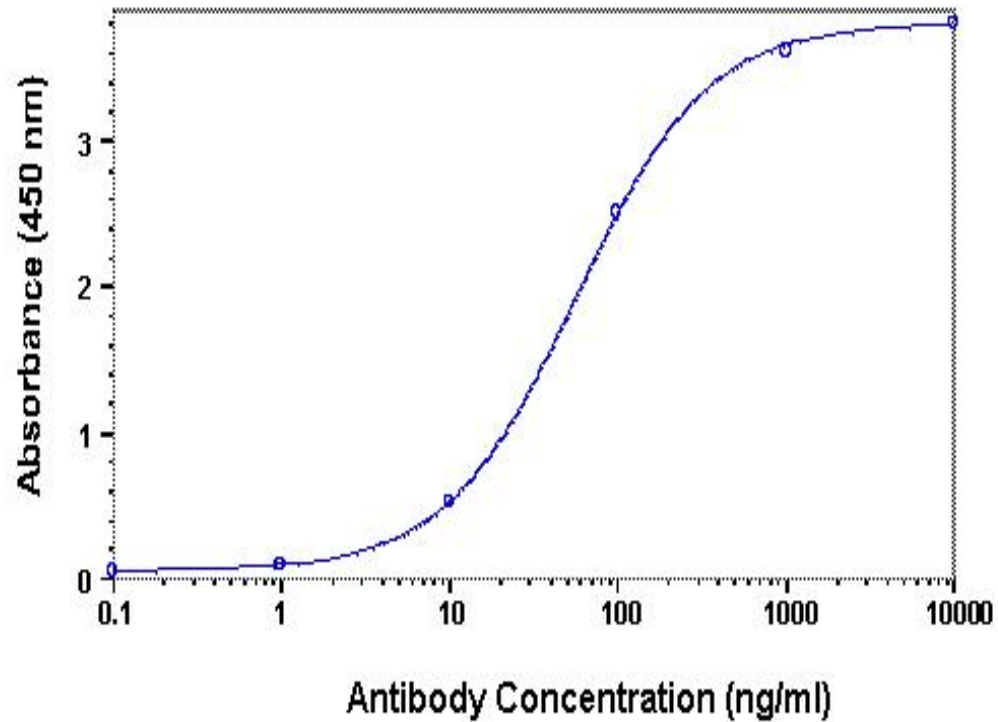

Anti-PIF- monoclonal antibody standard curve. Mouse monoclonal IgG was as primary antibody and Goat anti-Mouse IgG-HRP as 2nd antibody. Fixed amount of antigen (5 ug/ml) and serial dilutions of anti-PIF-Mab. The assay was linear up to 10ng/ml antibody.

Figure S3
